# Supplementary material
Source: PubMed Central journal article supplement (PMC3767499)
Supplement: 1313945110_pnas.201313945SI.pdf [file 1313945110_pnas.201313945SI.pdf]

# Supporting Information

Kanczkowski et al. 10.1073/pnas.1313945110

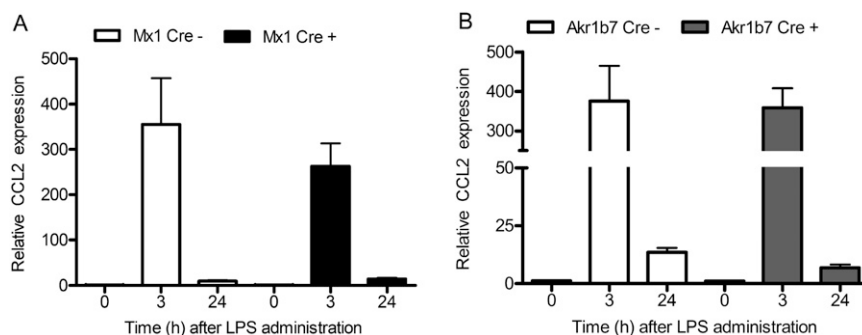

**Fig. S1.** LPS-mediated up-regulation of adrenal CCL2 expression is not affected by MyD88 deletion. Relative quantification of *CCL2* gene expression in the adrenal glands of mice with (A) general (Mx1<sup>Cre+</sup>-MyD88<sup>fl/fl</sup> mice; black bars) and (B) adrenocortical cell-specific inactivation of MyD88 (Akr1b7<sup>Cre+</sup>-MyD88<sup>fl/fl</sup> mice; gray bars). Tissue-specific inactivation of TLR signaling did not modulate LPS-mediated *CCL2* expression in the adrenal gland at either of the time points tested. Results are presented as means  $\pm$  SEM.
